# Supplementary material for: Gut microbiome of native Arab Kuwaitis
Source: PubMed Central journal article supplement (PMC7043038; doi:10.1186/s13099-020-00351-y), 2020-02-26
Supplement: 13099_2020_351_MOESM1_ESM.pdf [file 13099_2020_351_MOESM1_ESM.pdf]

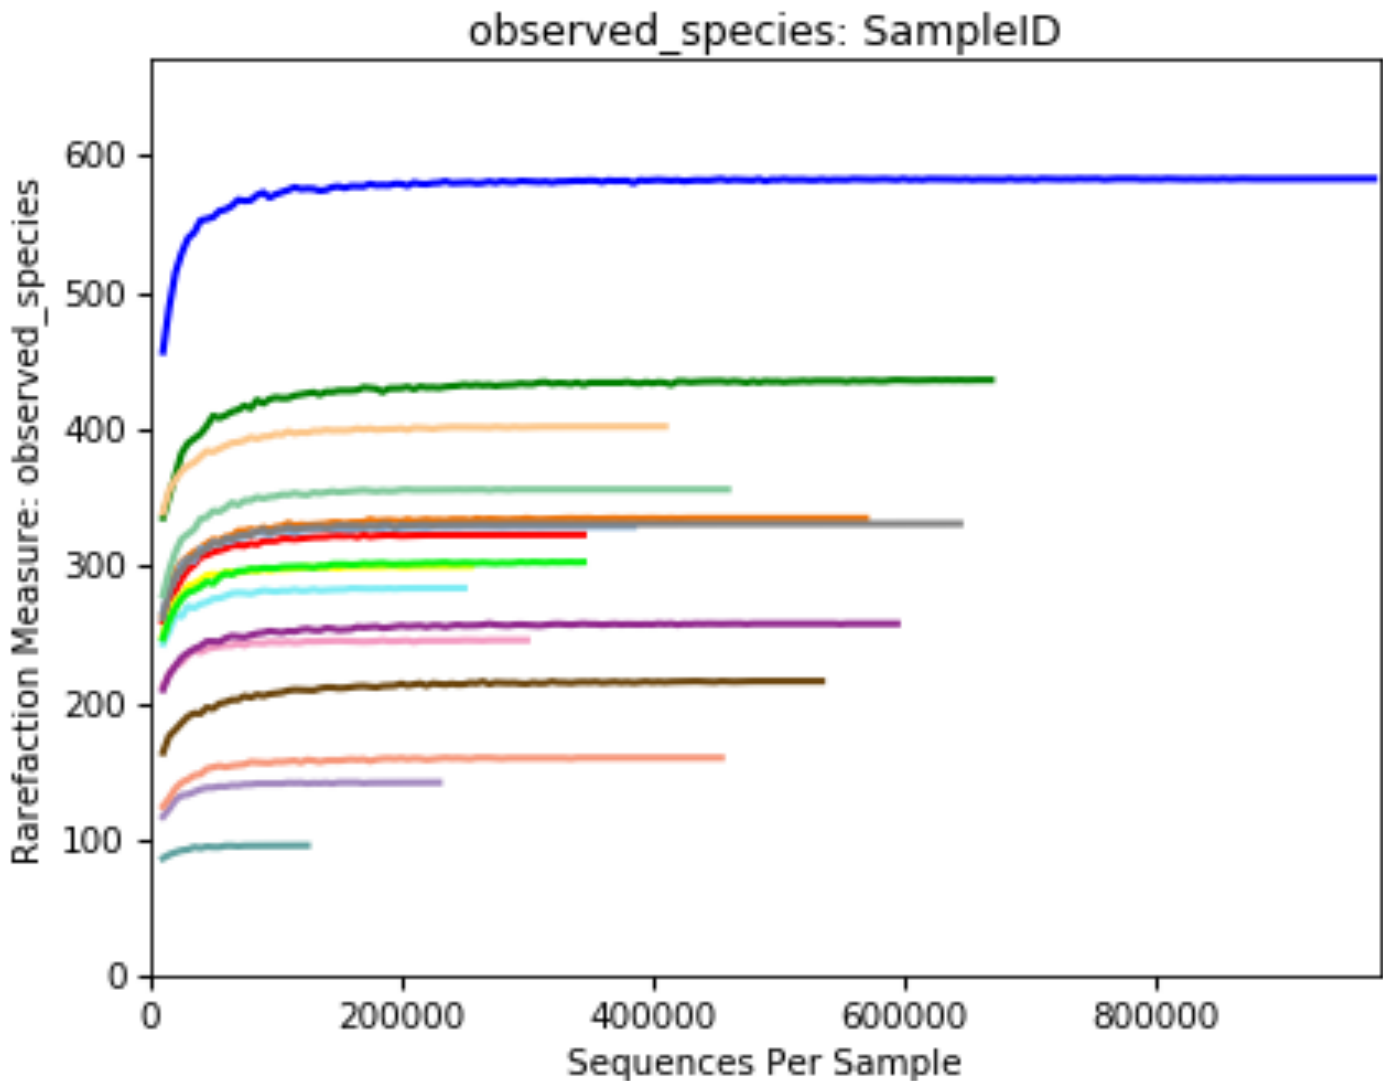

**Additional file 1: Figure S1** – Alpha rarefaction curve shows a plateau in the number of observed species (i.e. ASVs) indicating that the samples included in this study were sequenced to an adequate depth.
