# Supplementary material for: Gut microbiome of native Arab Kuwaitis
Source: Gut Pathog. 2020 Feb 26;12:10. doi: 10.1186/s13099-020-00351-y (PMC7043038; doi:10.1186/s13099-020-00351-y)
Supplement: Supplementary file 4 — Additional file 4: Figure S2. Phylogeny tree showing the inferred relationship between the 225 ASVs classified in the genus Bacteroides and the 16S rRNA gene sequences from the type strain for each of the recognized species in the genus Bacteroides. [file 13099_2020_351_MOESM4_ESM.pdf]

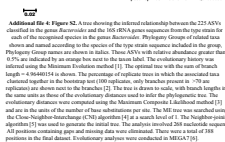

**Additional file 2: Figure S2.** A tree showing the inferred relationship between the 222 VSVs. Bootstrap values for each branch (nucleotide) and the 1018 dRNA gene sequences from the type strain for each of the recognized species in the genus *Fluviviridae*. Phylogeny Group of related taxa were named according to the species of the type strain sequence included in the group. Phylogeny Group names are shown in italics. These VSVs with relative abundance greater than 0.7% are shown in bold. The phylogenetic tree was inferred using the Maximum Entropy method [5]. The optimal tree with the sum of branch length = 4.9640415 is shown. The percentage of replicate trees in which the associated taxa clustered together in the bootstrap test (1000 replicates) is shown at the nodes. Branches with a bootstrap value of 100 (1000 replicates) are shown next to the branches [2]. The tree is drawn to scale, with branch lengths in the same units as those of the evolutionary distances used to infer the phylogenetic tree. The evolutionary distances were computed using the Minimum Composite Likelihood method [3]. The analysis was conducted using the PhyML 3.0 software [4]. The phylogenetic tree of the Close-Neighbour-Search (CNS) algorithm [4] at a search level of 1. The Neighbour-join algorithm [5] was used to generate the initial tree. The analysis involved 268 nucleotide positions. The containing gaps and missing data were deleted. There were 268 positions in the final dataset. Evolutionary analyses were conducted in MEGA7 [6].

1. Rzhensky A. and Nui M. (1992). A simple method for estimating and testing maximum evolution. *Molecular Biology and Evolution* 9: 905-907.
2. Felsenstein J. (1985). Confidence limits on phylogenies: An approach using the bootstrap. *Evolution* 39: 783-791.
3. Tamura K., Nui M. and Kumar S. (2004). Prospects for inferring very large phylogenies by using the neighbor-joining method. *Proceedings of the National Academy of Sciences (USA)* 101: 11039-11045.
4. Nui M. and Kumar S. (2000). *Molecular Evolution and Phylogenetics*. Oxford University Press, New York.
5. Saitou N. and Nui M. (1987). The neighbor-joining method: A new method for reconstructing phylogenetic trees. *Molecular Biology and Evolution* 4: 406-425.
